# Supplementary material for: PU.1-driven Th9 Cells Promote Colorectal Cancer in Experimental Colitis Models Through Il-6 Effects in Intestinal Epithelial Cells
Source: PubMed Central journal article supplement (PMC10197880; doi:10.1093/ecco-jcc/jjac097), 2022-07-06
Supplement: jjac097_suppl_supplementary_figure_1.pdf [file jjac097_suppl_supplementary_figure_1.pdf]

A

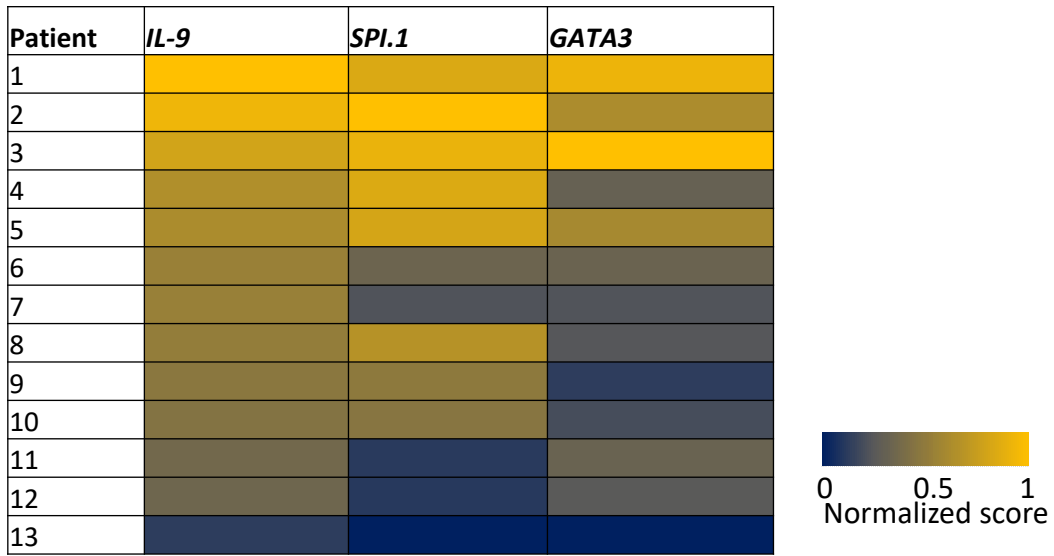

B

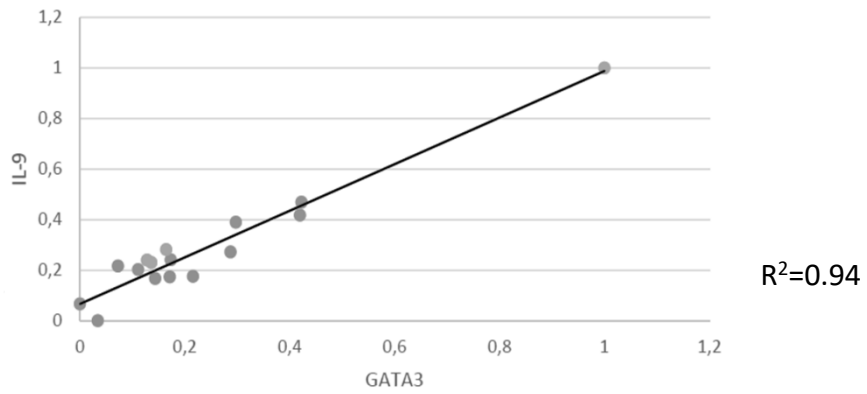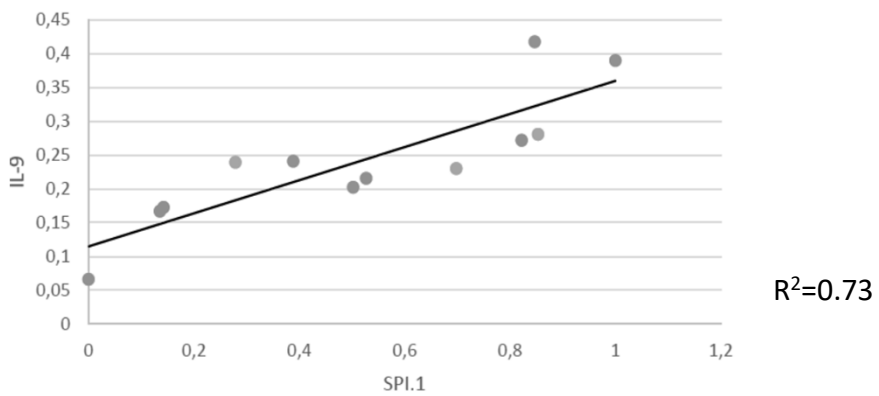

Supplementary Fig. 1
