# Supplementary material for: PU.1-driven Th9 Cells Promote Colorectal Cancer in Experimental Colitis Models Through Il-6 Effects in Intestinal Epithelial Cells
Source: PubMed Central journal article supplement (PMC10197880; doi:10.1093/ecco-jcc/jjac097), 2022-07-06
Supplement: jjac097_suppl_supplementary_figure_41.pdf [file jjac097_suppl_supplementary_figure_41.pdf]

| antibody                    | species      | application              | validation                                                                                                                                                                                                                                                                                                                                                                                                    |
|-----------------------------|--------------|--------------------------|---------------------------------------------------------------------------------------------------------------------------------------------------------------------------------------------------------------------------------------------------------------------------------------------------------------------------------------------------------------------------------------------------------------|
| Anti CD3                    | Human        | Immunofluorescence       | Ryschich, E., et al., Expression of HLA class I/II antigens and T cell immune response in human neuroendocrine tumors of the pancreas. <i>Tissue Antigens</i> , 2003. 62(1): p. 48-54.                                                                                                                                                                                                                        |
| Anti IL9                    | Human        | Immunofluorescence       | 1:50                                                                                                                                                                                                                                                                                                                                                                                                          |
| Anti CD4                    | Human        | Immunofluorescence       | <a href="https://www.biolegend.com/en-us/products/purified-anti-human-cd4-antibody-3650">https://www.biolegend.com/en-us/products/purified-anti-human-cd4-antibody-3650</a>                                                                                                                                                                                                                                   |
| Anti PU.1                   | Human        | Immunofluorescence, FACS | 1:200                                                                                                                                                                                                                                                                                                                                                                                                         |
| Anti CD3                    | Mouse        | Immunofluorescence       | <a href="https://www.biolegend.com/en-us/products/purified-anti-mouse-cd3epsilon-antibody-28">https://www.biolegend.com/en-us/products/purified-anti-mouse-cd3epsilon-antibody-28</a>                                                                                                                                                                                                                         |
| Anti IL-9 R                 | Mouse        | Immunofluorescence       | Gerlach, K., et al., TH9 cells that express the transcription factor PU.1 drive T cell-mediated colitis via IL-9 receptor signaling in intestinal epithelial cells. <i>Nat Immunol</i> , 2014. 15(7): p. 676-86.                                                                                                                                                                                              |
| Anti Ki67                   | Mouse        | Immunofluorescence       | <a href="https://www.agilent.com/en/product/immunohistochemistry/antibodies-controls/primary-antibodies/ki-67-antigen-(dako-omnis)-76239">https://www.agilent.com/en/product/immunohistochemistry/antibodies-controls/primary-antibodies/ki-67-antigen-(dako-omnis)-76239</a>                                                                                                                                 |
| Anti IL-9                   | Mouse        | Immunofluorescence       | <a href="http://www.bdbiosciences.com/eu/applications/research/t-cell-immunology/th-9-cells/intracellular-markers/cytokines-and-chemokines/mouse/purified-nale-hamster-anti-mouse-il-9-d9302c12/p/554472">http://www.bdbiosciences.com/eu/applications/research/t-cell-immunology/th-9-cells/intracellular-markers/cytokines-and-chemokines/mouse/purified-nale-hamster-anti-mouse-il-9-d9302c12/p/554472</a> |
| Anti CD4                    | Mouse        | Immunofluorescence       | Yang, T., et al., Shifts in the Gut Microbiota Composition Due to Depleted Bone Marrow Beta Adrenergic Signaling Are Associated with Suppressed Inflammatory Transcriptional Networks in the Mouse Colon. <i>Front Physiol</i> , 2017. 8: p. 220.                                                                                                                                                             |
| Anti IL-6                   | Mouse        | Immunofluorescence       | Galie, M., et al., Mammary carcinoma provides highly tumorigenic and invasive reactive stromal cells. <i>Carcinogenesis</i> , 2005. 26(11): p. 1868-78.                                                                                                                                                                                                                                                       |
| anti-mCD4 <sup>PEcy7</sup>  | Mouse        | FACS                     | 1:800                                                                                                                                                                                                                                                                                                                                                                                                         |
| anti-mCD19 <sup>APC</sup>   | Mouse        | FACS                     | 1:800                                                                                                                                                                                                                                                                                                                                                                                                         |
| anti mCD8 <sup>PE</sup>     | Mouse        | FACS                     | 1:800                                                                                                                                                                                                                                                                                                                                                                                                         |
| anti-mEpCAM <sup>APC</sup>  | Mouse        | FACS                     | Galal, D., et al., ATF3 Sustains IL-22-Induced STAT3 Phosphorylation to Maintain Mucosal Immunity Through Inhibiting Phosphatases. <i>Front Immunol</i> , 2018. 9: p. 2522.                                                                                                                                                                                                                                   |
| anti-mEpCAM <sup>PE</sup>   | Mouse        | FACS                     | 1:200                                                                                                                                                                                                                                                                                                                                                                                                         |
| anti-hCD3 <sup>APC</sup>    | Human        | FACS                     | 1:20                                                                                                                                                                                                                                                                                                                                                                                                          |
| anti-mGATA3 <sup>APC</sup>  | Human/Mouse  | FACS                     | 1:20                                                                                                                                                                                                                                                                                                                                                                                                          |
| anti-mFoxP3 <sup>APC</sup>  | Human/Mouse  | FACS                     | 1:200                                                                                                                                                                                                                                                                                                                                                                                                         |
| anti-mRORgt <sup>APC</sup>  | Human/Mouse  | FACS                     | Moretti, S., et al., A mast cell-ILC2-Th9 pathway promotes lung inflammation in cystic fibrosis. <i>Nat Commun</i> , 2017. 8: p. 14017.                                                                                                                                                                                                                                                                       |
| anti-mTbet <sup>APC</sup>   | Human/Mouse  | FACS                     | <a href="https://www.labome.com/product/Miltenyi-Biotec/130-098-607.html">https://www.labome.com/product/Miltenyi-Biotec/130-098-607.html</a>                                                                                                                                                                                                                                                                 |
| anti-mIL-6 <sup>PE</sup>    | Mouse        | FACS                     | 1:800                                                                                                                                                                                                                                                                                                                                                                                                         |
| anti-mIL-9 <sup>PE</sup>    | Mouse        | FACS                     | 1:800                                                                                                                                                                                                                                                                                                                                                                                                         |
| anti-hIL-9 <sup>PE</sup>    | Human        | FACS                     | <a href="https://www.biolegend.com/de-at/products/pe-anti-human-il-9-antibody-1974">https://www.biolegend.com/de-at/products/pe-anti-human-il-9-antibody-1974</a>                                                                                                                                                                                                                                             |
| anti-mpSTAT3 <sup>APC</sup> | Mouse /Human | FACS                     | 1:100                                                                                                                                                                                                                                                                                                                                                                                                         |
| anti SOCS3                  | Mouse        | WB                       | 1:1000                                                                                                                                                                                                                                                                                                                                                                                                        |
| anti Claudin2               | Mouse        | WB                       | 0.5-2 µg/mL                                                                                                                                                                                                                                                                                                                                                                                                   |
| anti Claudin3               | Mouse        | WB                       | Kern, M., et al., Altered Cytokine Expression and Barrier Properties after In Vitro Infection of Porcine Epithelial Cells with Enterotoxigenic Escherichia coli and Probiotic Enterococcus faecium. <i>Mediators Inflamm</i> , 2017. 2017: p. 2748192.                                                                                                                                                        |

## Supplementary Fig. 4
