# Supplementary material for: PU.1-driven Th9 Cells Promote Colorectal Cancer in Experimental Colitis Models Through Il-6 Effects in Intestinal Epithelial Cells
Source: PubMed Central journal article supplement (PMC10197880; doi:10.1093/ecco-jcc/jjac097), 2022-07-06
Supplement: jjac097_suppl_supplementary_figure_42.pdf [file jjac097_suppl_supplementary_figure_42.pdf]

| applicable                      | Supplier name  | Catalogue number | clone      | Lot number  |
|---------------------------------|----------------|------------------|------------|-------------|
| Hs anti CD3                     | BioLegend      | 300402           | UCHT1      | B242090     |
| Hs anti IL-9                    | BioLegend      | 507602           | MH9A4      | B146870     |
| Hs anti CD4                     | BioLegend      | 317402           | OKT4       | B201306     |
| Hs Mm anti PU.1                 | invitrogen     | MA5-15064        | E.388.3    | TD2551748   |
| Mm anti CD3                     | BioLegend      | 100302           | 145-2c11   | B253421     |
| Mm anti IL-9R                   | Acris          | DM3569P          | 12F43      | 180201FP1   |
| Mm anti Ki67                    | DAKO           | M7249            | TEC-3      | 00074047    |
| Mm anti IL-9                    | BD             | 554472           | D9302C12   | 6243643     |
| Mm anti CD4                     | ebioscience    | 14-0041-85       | GK1.5      | E03465-1634 |
| Mm anti IL-6                    | BioLegend      | 504502           | MP5-20F3   | B158892     |
| Mm anti Claudin2                | invitrogen     | 516100           | polyclonal | 1248417A    |
| Mm anti Claudin3                | invitrogen     | 34-1700          | polyclonal | 1248418A    |
| Mm anti SOCS3                   | Cell Signaling | 2923             | polyclonal | 2           |
| Anti rabbit Alexa 488           | invitrogen     | A11008           | N/A        | 1735088     |
| Anti rabbit Alexa 594           | invitrogen     | A11012           | N/A        | 1704538     |
| Anti rat Alexa 555              | invitrogen     | A21434           | N/A        | 1783421     |
| Anti rat Alexa 488              | invitrogen     | A11006           | N/A        | 1423045     |
| rat-anti-mCD4 <sup>PECy7</sup>  | BioLegend      | 100528           | RM4-5      | B214651     |
| rat-anti-mCD19 <sup>APC</sup>   | BioLegend      | 115511           | 6D5        | B160517     |
| rat-anti mCD8 <sup>PE</sup>     | BioLegend      | 100708           | 53-6.7     | B234269     |
| rat-anti-mEpCAM <sup>APC</sup>  | ebioscience    | 17-5791-82       | G8.8       | B217174     |
| rat-anti-mEpCAM <sup>PE</sup>   | BioLegend      | 118206           | G8.8       | B214526     |
| mouse-anti-hCD3 <sup>APC</sup>  | BioLegend      | 317318           | Okt 03     | B263368     |
| rat-anti-mCD3 <sup>APC</sup>    | BioLegend      | 100312           | 145-2C11   | B237984     |
| rat-anti-mGATA3 <sup>APC</sup>  | ebioscience    | 50-9966-42       | TWJ        | 2048839     |
| rat-anti-mFoxP3 <sup>APC</sup>  | ebioscience    | 50-5773-82       | FJK-16s    | B228445     |
| rat-anti-mROrgt <sup>APC</sup>  | Miltenyi       | 130-103-838      | N/A        | 5180829193  |
| rat-anti-mTbet <sup>APC</sup>   | Miltenyi       | 130-098-607      | N/A        | 5180829180  |
| rat-anti-mIL-6 <sup>PE</sup>    | BD             | 554401           | N/A        | 7159590     |
| rat-anti-mIL-9 <sup>PE</sup>    | BioLegend      | 514103           | RM9A4      | B202261     |
| mouse-anti-hIL-9 <sup>PE</sup>  | BioLegend      | 507605           | MH9A4      | B173059     |
| rat-anti-mpSTAT3 <sup>APC</sup> | ebioscience    | 17-9033-42       | LUVNKLA    | 4316341     |
| anti-rabbit HRP                 | Cell Signaling | 7074S            | polyclonal | 26          |
| B-Actin                         | Santa Cruz     | sc-47778         | C4         | J2915       |

## Supplementary Fig. 4
